# Supplementary material
Source: Springer Nature journal article supplement (https://www.springermedizin.de/resource/supplementary/12985_2014_2401_MOESM2_ESM.pdf/9607034)

**A**

COS

HT29

MDCK

Huh7

3a

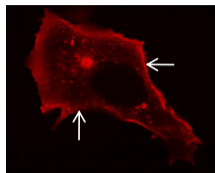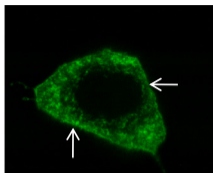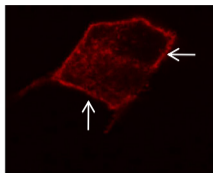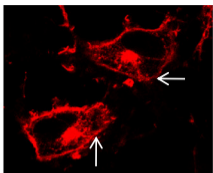**B**

3a

Cyto3a

 $\Delta YXX\Phi$  $\Delta EXD$ 

Total

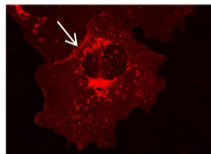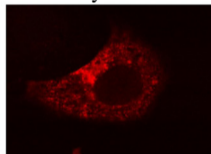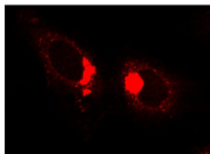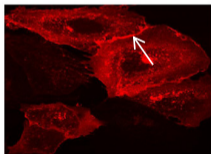

Surface

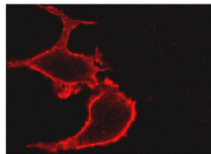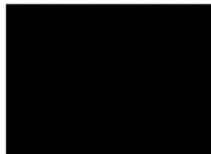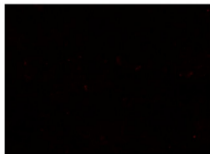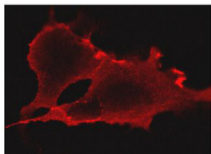

Supplement: MOESM2 [file 9607034]
